# Supplementary material for: Sequence specificity despite intrinsic disorder: How a disease-associated Val/Met polymorphism rearranges tertiary interactions in a long disordered protein
Source: PubMed Central journal article supplement (PMC6821141; doi:10.1371/journal.pcbi.1007390), 2019-10-18
Supplement: pcbi.1007390.s001.pdf [file pcbi.1007390.s001.pdf]

Table S1: **Summary of force-field comparison simulations.**

| Force-field             | RMSD <sub>a</sub><br>$\Delta\delta C_\alpha$ | $\langle R_g \rangle^b$ | Equilibration <sub>c</sub><br>length | No. of <sub>d</sub><br>replicas | Temperature range <sup>e</sup> | Simulation <sub>f</sub><br>length |
|-------------------------|----------------------------------------------|-------------------------|--------------------------------------|---------------------------------|--------------------------------|-----------------------------------|
| aff03sbws (Tip4p/2005)  | 0.855                                        | 1.347 $\pm$ 0.007       | 400 ns                               | 36                              | 280-360K                       | 700 ns                            |
| a99sb*-ildn-q (Tip4p-D) | 0.355                                        | 1.270 $\pm$ 0.007       | 200 ns                               | 36                              | 280-360K                       | 500 ns                            |
| a99sbws (Tip4p/2005)    | 0.425                                        | 1.277 $\pm$ 0.007       | 200 ns                               | 36                              | 280-360K                       | 500 ns                            |
| c36m (Tip3p)            | 0.350                                        | 1.306 $\pm$ 0.007       | 200 ns                               | 30                              | 280-360K                       | 500 ns                            |
| a99sb-ildn (Tip3p)      | 0.617                                        | 0.922 $\pm$ 0.003       | 200 ns                               | 32                              | 280-420K                       | 500 ns                            |

<sup>a</sup> Root-mean-squared deviation (RMSD) represents the deviation between the NMR and MD  $\Delta\delta C_\alpha$ .

<sup>b</sup> Statistical uncertainties are provided for  $\langle R_g \rangle$  as the standard error in the mean, where n is the product of the total number of replicas simulated and the average number of roundtrips per replica.

<sup>c</sup> Simulation period discarded for equilibration for each replica.

<sup>d</sup> Total number of replicas simulated using T-REMD.

<sup>e</sup> Temperature range for T-REMD.

<sup>f</sup> Total simulation length for each replica.
